# Supplementary material
Source: PubMed Central journal article supplement (PMC3449391)
Supplement: 97320630008749S1.pdf [file 97320630008749S1.pdf]

## Supplementary material:

**Table 1:** Algorithms or rules for rational design of siRNA molecules

| Ui-Tei Rules                                                    | Amarzguioui Rules                                                     | Reynolds Rules                                                                                             |
|-----------------------------------------------------------------|-----------------------------------------------------------------------|------------------------------------------------------------------------------------------------------------|
| A/U at the 5' terminus of the sense strand                      | Duplex End A/U differential > 0.<br>Strong binding of 5' sense strand | Each rule is assigned a score which is summed up to a total duplex score to improve the efficacy of siRNA. |
| G/C at the 5' terminus of the antisense strand                  | No U at position 1.<br>Presence of A at position 6.                   |                                                                                                            |
| At least 4 A/U residues in the 5' terminal 7 bp of sense strand | Weak binding of 3' sense strand.<br>No G at position 19               |                                                                                                            |
| No GC stretch longer than 9nt                                   |                                                                       |                                                                                                            |

**Table 2:** Worldwide, genome isolates of HDV

| Group     | Genome isolate | Country   | Accession No  | Location of coding region in genome | Length (Base pair) |
|-----------|----------------|-----------|---------------|-------------------------------------|--------------------|
| Group I   | Cagliri        | Cagliri   | X85253        | 1008-1595                           | 1676               |
|           | China          | China     | X77627        | 82-666                              | 1674               |
|           | Ethiopia       | Ethiopia  | U81989        | 1011-1598                           | 1679               |
|           | IR-1           | Iran      | AY633627      | 1007-1594                           | 1676               |
|           | Italy          | Italy     | X04451        | 950-1618                            | 1678               |
|           | Lebanon1       | Lebanon   | M84917        | Not Available                       | 1678               |
|           | Nauru          | Nauru     | M58629        | 952-1598                            | 1678               |
|           | Somalia        | Somalia   | U81988        | 1006-1593                           | 1674               |
|           | Taiwan         | Taiwan    | M92448        | 951-1595                            | 1682               |
|           | TW2667         | Taiwan    | AF104263      | 951-1595                            | 167                |
|           | US-1           | US        | D01075        | 1013-1600                           | 1682               |
|           | US-2           | US        | L22066        | 1013-1600                           | 1681               |
|           | Nagasaki-2     | Nagasaki  | AB118849      | 950-1594                            | 1675               |
|           | OA             | Turkey    | EF514905      | 950-1594                            | 1676               |
|           | NK             | Turkey    | EF514904      | 950-1594                            | 1676               |
|           | SO             | Turkey    | EF514906      | 950-1594                            | 1676               |
|           | ZA             | Turkey    | EF514907      | 950-1594                            | 1676               |
|           | CB             | Turkey    | EF514903      | 950-1594                            | 1676               |
|           | W5             | Italy     | AJ307077      | 954-1598                            | 1679               |
|           | TW3678#25      | Taiwan    | AY648959      | 1006-1593                           | 1674               |
|           | TW5132#24      | Taiwan    | AY648957      | 1007-1594                           | 1675               |
|           | TW1573#4       | Taiwan    | AY648958      | 1006-1593                           | 1674               |
|           | TW1435#47      | Taiwan    | AY648956      | 1007-1594                           | 1675               |
| JN        | China          | HM046802  | 952-1596      | 1677                                |                    |
| Group II  | Japan          | Japan     | X60193        | 1013-1600                           | 1683               |
|           | Yakut-26       | Russia    | AJ309879      | 964-1605                            | 1685               |
|           | Yakut-62       | Russia    | AJ309880      | 964-1605                            | 1688               |
|           | TW2476         | Taiwan    | AF104264      | 956-1600                            | 1684               |
| Group III | 3              | Taiwan    | U19598        | 949-1593                            | 1676               |
|           | Miyako-37      | Japan     | AB118846      | 952-1596                            | 1678               |
|           | Peru-1         | Peru      | L22063        | 953-1597                            | 1677               |
|           | VnzD8375       | Venezuela | AB037947      | 1007-1591                           | 1672               |
|           | VnzD8349       | Venezuela | AB037948      | 1008-1592                           | 1673               |
| Group IV  | VnzD8624       | Venezuela | A B037949     | 1009-1593                           | 1674               |
|           | Miyako         | Japan     | AF309420      | 1011-1595                           | 1676               |
| Group V   | L215           | Japan     | AB088679      | 961-1602                            | 1682               |
|           | Miyako-36      | Japan     | AB118845      | 955-1596                            | 1677               |
|           | Taiwan TW-2b   | Taiwan    | AF018077      | 1012-1596                           | 1676               |
|           | AF209859       | Taiwan    | AF209859      | 1013-1597                           | 1678               |
|           | Tokiyo         | Japan     | AB118847      | 957-1598                            | 1678               |
|           | TW3038#25      | Taiwan    | AY648955      | 1014-1598                           | 1678               |
|           | 2621#56        | Taiwan    | AY648953      | 1014 -1598                          | 1678               |
|           | TW1025#14      | Taiwan    | AY648954      | 1014-1598                           | 1678               |
|           | TWD62#16       | Taiwan    | AY648952      | 1014-1598                           | 1678               |
|           | dFr2005        | Guinea    | AM183331      | 958-1602                            | 1687               |
| dFr2600   | Togo           | AM183326  | 963-1607      | 1691                                |                    |
| dFr47     | Not Available  | AX741149  | Not Available | 1697                                |                    |
| dFr910    | Mali           | AX741159  | Not Available | 1697                                |                    |
| dFr-73    | Not Available  | AX741154  | Not Available | 1697                                |                    |
| dFr-2703  | Senegal        | AM183328  | 1017-1604     | 1688                                |                    |

|            |            |                          |          |               |      |
|------------|------------|--------------------------|----------|---------------|------|
| Group VI   | dFr48      | Poland                   | AX741164 | Not Available | 1687 |
|            | dFr2139    | Central African Republic | AM183332 | 951-1592      | 1677 |
|            | dFr2627    | Nigeria                  | AM183329 | 956-1597      | 1680 |
| Group VII  | dFr45      | Not Available            | AX741144 | Not Available | 1672 |
|            | dFr2158    | Cameroon                 | AM183333 | 949-1593      | 1674 |
| Group VIII | dFr2072    | Senegal                  | AM183330 | 1011-1598     | 1681 |
|            | dFr644     | Cogo-Brazzaville         | AX741169 | Not Available | 1680 |
|            | dFr2736    | Cote d' Ivoire           | AM183327 | 954-1598      | 1681 |
| Group IX   | HDV-DN79   | Gabon                    | GU177114 | 1010-1597     | 1679 |
|            | Isolate- 1 | Turkey                   | HQ005370 | 785-1372      | 1679 |
|            | Isolate- 2 | Turkey                   | HQ005371 | 785-1372      | 1679 |
|            | Isolate- 3 | Turkey                   | HQ005372 | 774-1361      | 1673 |
|            | Isolate- 4 | Turkey                   | HQ005369 | 786-1373      | 1684 |
|            | Isolate- 5 | Turkey                   | HQ005364 | 730-1374      | 1681 |
|            | Isolate- 6 | Turkey                   | HQ005366 | 786-1373      | 1683 |
|            | Isolate- 7 | Turkey                   | HQ005365 | 729-1373      | 1682 |
|            | Isolate-8  | Turkey                   | HQ005367 | 730-1374      | 1685 |
|            | Isolate -9 | Turkey                   | HQ005368 | 786-1373      | 1681 |

**Table 3:** Predicted siRNA target for genome isolates of HDV, worldwide

| Accession No | Target    | Location of target within gene | siRNA target sequence within gene |
|--------------|-----------|--------------------------------|-----------------------------------|
| X85253       | Target-1  | 412-434                        | TCCGAGAATTCCTTTGATGTTTC           |
|              | Target-2  | 451-473                        | GTCCTCTAACTTCTTGATTTTCT           |
| U81989       | Target-3  | 454-476                        | CTCGAGTTTCTTGATCTTCTTCT           |
| AY633627     | Target-4  | 408-430                        | TCCGAGAATTCCTTTGATGTTTC           |
| X04451       | Target-5  | 472-494                        | TCCGAGAATTCCTTTGATGTTCC           |
| M92448       | Target-6  | 469-491                        | TCCGAGAATTCCTTTGATGTTTC           |
| AF104263     | Target-7  | 412-434                        | TCCGAGAATTCCTTTGATGTTTC           |
|              | Target-8  | 469-491                        | TCCGAGAATTCCTTTGATGTTTC           |
| D01075       | Target-9  | 412-434                        | TCCGAGAATTCCTTTGATGTTTC           |
| L22066       | Target-10 | 412-434                        | TCCGAGAATTCCTTTGATGTTTC           |
| AB118849     | Target-11 | 511-533                        | CTCAAGTATCTTGATATTCTTCT           |
| EF514905     | Target-12 | 454-476                        | CTCGAGTTTCTTGATCTTCTTCC           |
|              | Target-13 | 511-533                        | CTCGAGTTTCTTGATCTTCTTCC           |
| EF514904     | Target-14 | 454-476                        | CTCGAGTTTCTTGATCTTCTTCC           |
|              | Target-15 | 511-533                        | CTCGAGTTTCTTGATCTTCTTCC           |
| EF514906     | Target-16 | 454-476                        | CTCGAGTTTCTTGATCTTCTTCC           |
|              | Target-17 | 511-533                        | CTCGAGTTTCTTGATCTTCTTCC           |
| EF514907     | Target-18 | 454-476                        | CTCGAGTTTCTTGATCTTCTTCC           |
|              | Target-19 | 511-533                        | CTCGAGTTTCTTGATCTTCTTCC           |
| EF514903     | Target-20 | 454-476                        | CTCGAGTTTCTTGATCTTCTTCC           |
|              | Target-21 | 511-533                        | CTCGAGTTTCTTGATCTTCTTCC           |
| AJ307077     | Target-22 | 412-434                        | TCCGAGAATTCCTTTGATGTTCC           |
|              | Target-23 | 441-463                        | AGGGATTTTCGTCCTCTATCTTC           |
|              | Target-24 | 451-473                        | GTCCCTATCTTCTTGAGTTTCT            |
| AY648959     | Target-25 | 412-434                        | TCCGAGTATTCCTTTGATGTTTC           |
| AY648957     | Target-26 | 412-434                        | TCCGAGAATTCCTTTGATGTTTC           |
| AY648958     | Target-27 | 412-434                        | TCCGAGAATTCCTTTGATGTTTC           |
| AY648956     | Target-28 | 412-434                        | TCCGAGAATTCCTTTGATGTTTC           |

|          |           |         |                          |
|----------|-----------|---------|--------------------------|
| HM046802 | Target-29 | 412-434 | TCCGAGAATTCCTTTGATGTTCC  |
|          | Target-30 | 441-463 | AGGGATTTTCGTCCTCTATCTTC  |
|          | Target-31 | 451-476 | GTCCCTCTATCTTCTTGAGTTTCT |
|          | Target-32 | 469-491 | TCCGAGAATTCCTTTGATGTTCC  |
|          | Target-33 | 498-520 | AGGGATTTTCGTCCTCTATCTTC  |
|          | Target-34 | 508-530 | GTCCCTCTATCTTCTTGAGTTTCT |
| AB118845 | Target-35 | 48-70   | GAGGGTTAACCTACGGAAATTC   |
| AB118847 | Target-36 | 48-70   | GAGGGTTAACCTACGGAAATTC   |
| AM183332 | Target-37 | 551-573 | TCGAGTTCATCTCGATTTTTTCT  |
| HQ005370 | Target-38 | 237-259 | CTCCAGAAAGTTGCTTCTTCTTG  |
|          | Target-39 | 412-434 | TCCGAGAATTCCTTTGATGTTCC  |
| HQ005371 | Target-40 | 410-432 | TCCGAGAATTCCTTTGATGTTCC  |
|          | Target-41 | 494-516 | TCGAGTTCCTTAACTTTTTCT    |
| HQ005372 | Target-42 | 237-259 | CTCCAGATAGTTGCTTCTTCTTG  |
|          | Target-43 | 412-434 | TCCGAGAATTCCTTTGATGTTCC  |
| HQ005364 | Target-44 | 469-491 | TCCGAGAATTCCTTTGATGTTCC  |
| HQ005366 | Target-45 | 412-434 | TCCGAGAATTCCTTTGATGTTCC  |
| HQ005365 | Target-46 | 469-491 | TCCGAGAATTCCTTTGATGTTCC  |
|          | Target-47 | 554-576 | TCGAGTTCATCGGCTCTTTTTCT  |
| HQ005367 | Target-48 | 469-491 | TCCGAGAATTCCTTTGATGTTCC  |

**Table 4:** Two effective siRNA molecule with GC%, free energy of folding and free energy of binding with target

| Target             | Location of target within mRNA | siRNA target within in consensus | Predicted siRNA duplex                                 | GC%  | Free energy of folding of siRNA candidate at 37°C | Free energy of Binding with target |
|--------------------|--------------------------------|----------------------------------|--------------------------------------------------------|------|---------------------------------------------------|------------------------------------|
| Consensus Target-1 | 478-501                        | TCCGAGAATTCCTTTGATGTTCT          | AACAUCAAGGAAUUCUCG<br>GA<br>CGAGAAUUCUUUGAUGUU<br>UC   | 47.1 | 0.15                                              | -21.21                             |
| Consensus Target-2 | 508-530                        | GTCCCTCTATCTTCTTGATTTTCT         | AAAAUCAAGAAGAUAGAGG<br>AC<br>CCUCUAUCUUCUUGAUUUU<br>CU | 36.8 | -0.82                                             | -9.41                              |
